# Supplementary material for: The sonochemical approach improves the CuO–ZnO/TiO2 catalyst for WGS reaction
Source: Royal Society of Chemistry journal article supplement (doi:10.1039/c3cp55307h), 2014-01-01
Supplement: c3cp55307h1.pdf [file c3cp55307h1.pdf]

Supporting information

## Doping of ZnO into CuO phase by sonochemical approach improves the CuO-ZnO/TiO<sub>2</sub> catalyst for WGS reaction

Nina Perkas<sup>a</sup>, Poernomo Gunawan<sup>b</sup>, Galina Amirian<sup>a</sup>, Zhan Wang<sup>b</sup>, Ziyi Zhong<sup>b\*</sup>, Aharon Gedanken<sup>a\*</sup>

<sup>a</sup>Department of Chemistry and Kanbar Laboratory for Nanomaterials at Bar-Ilan University Center for Advanced Materials and Nanotechnology;

<sup>b</sup>Institute of Chemical and Engineering Sciences, 1 Pesek Road, Jurong Island, Singapore 627833, Singapore

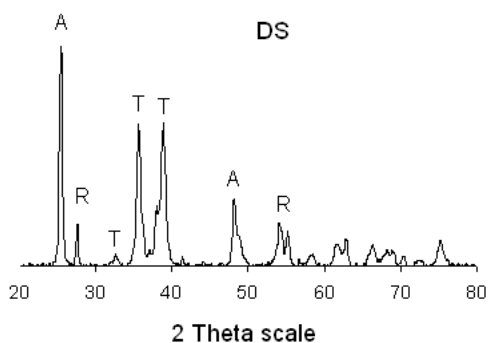

**Figure SI-1.** XRD patterns of the CuO-ZnO/TiO<sub>2</sub> catalyst prepared by sonochemical method with the commercial titania (A – TiO<sub>2</sub> anatase, R - TiO<sub>2</sub> rutile, T - CuO tenorite).

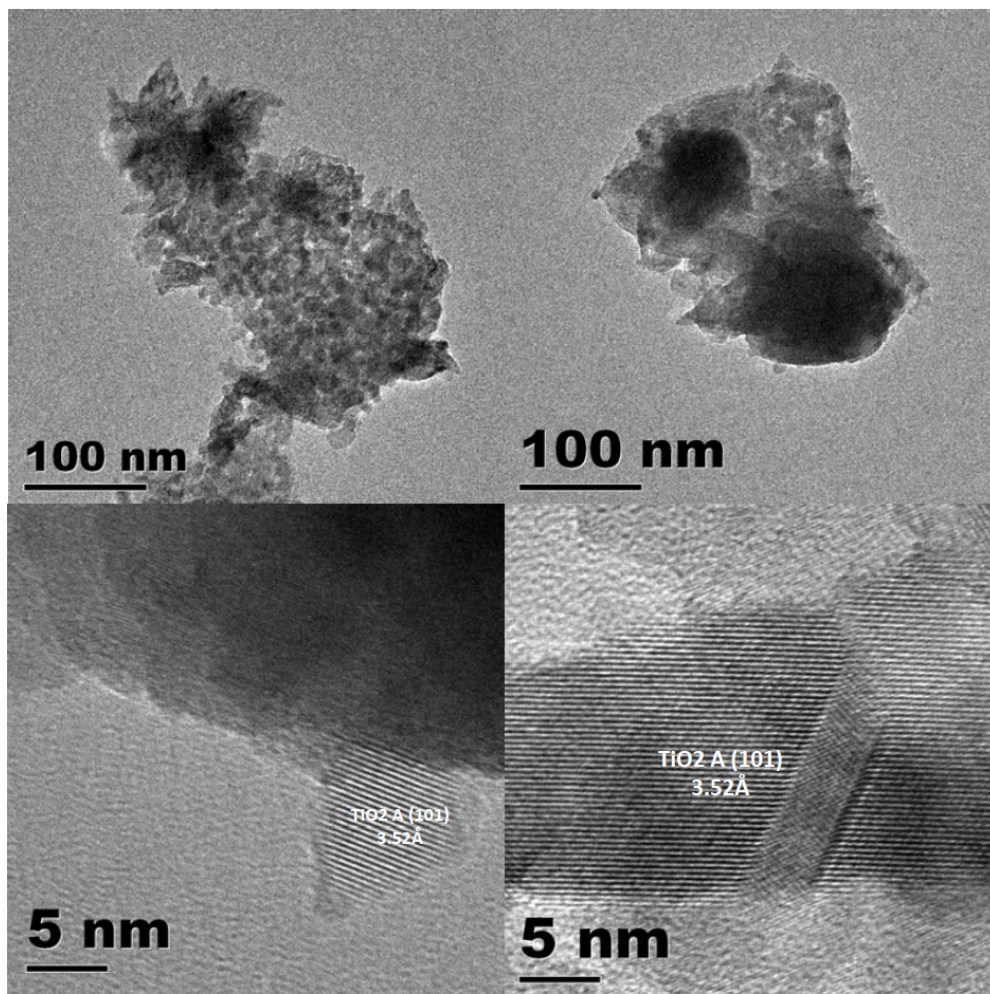

**Figure SI-2.** HRTEM images of the S500 catalyst reduced in H<sub>2</sub> at 350°C. Some rod-like structures were developed after the H<sub>2</sub>-reduction. After checking various areas, it is determined that these rod-like structures are anatase (TiO<sub>2</sub> A). The interplanar spacings are referred to the following JCPDS cards:

TiO<sub>2</sub> Anatase (101) : 0.352 nm; TiO<sub>2</sub> Anatase (004) : 0.238 nm (JCPDS no. 00-021-1272)

TiO<sub>2</sub> Rutile (110) : 0.322 nm (JCPDS no. 00-021-1276)

CuO Tenorite (110): 0.275 nm; CuO Tenorite (002): 0.253 nm ; CuO Tenorite (202): 0.186 nm (JCPDS no. 00-041-0254).

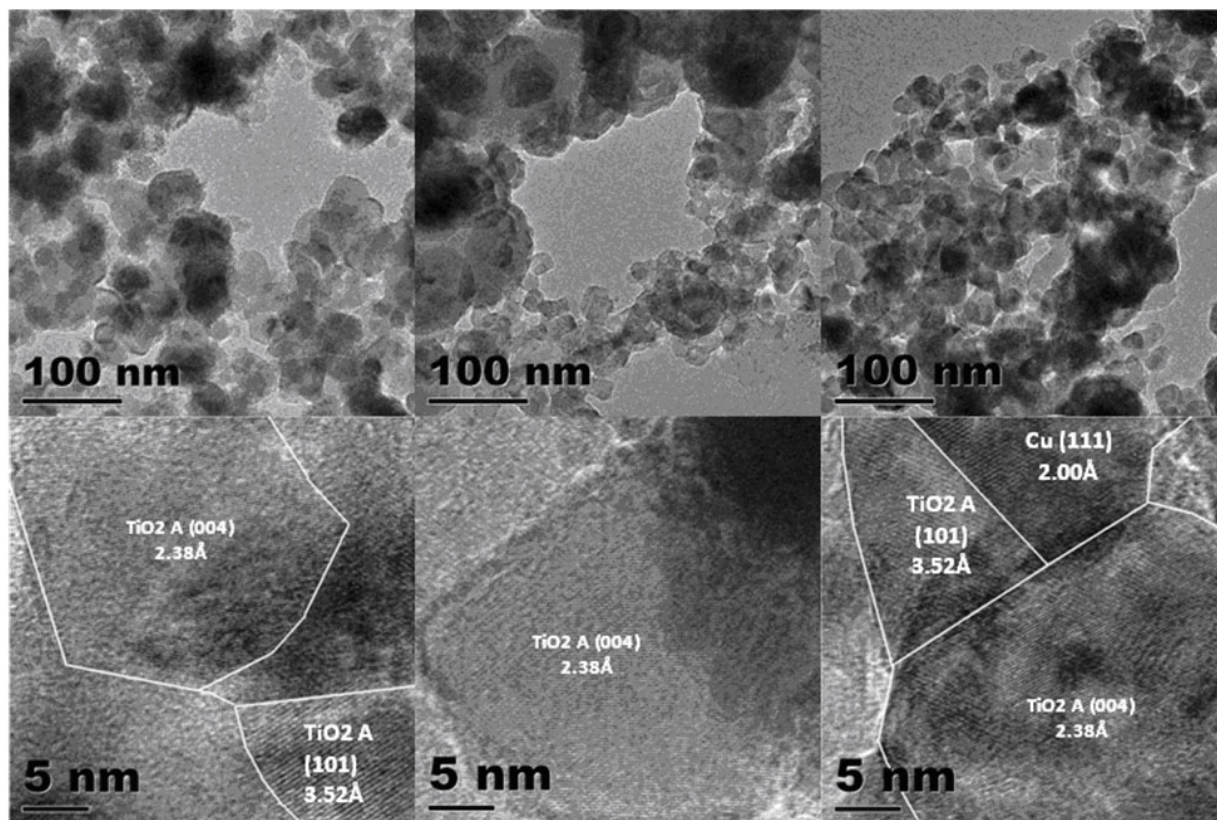

**Figure SI-3.** TEM images of the DS catalyst reduced in  $\text{H}_2$  at  $350^\circ\text{C}$ . There was no obvious change in structure and morphology, indicating the support and catalyst are stable in structure.

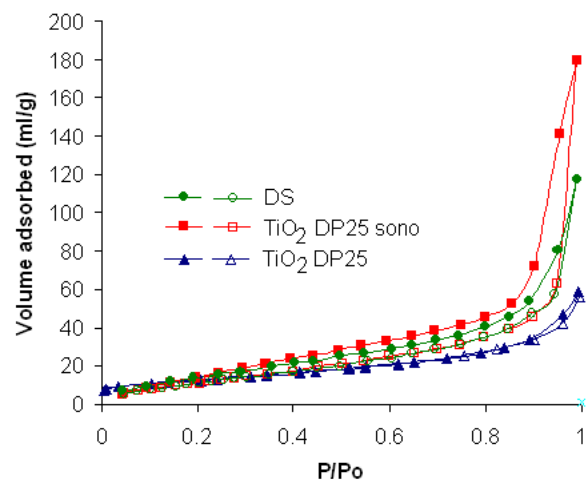

**Figure SI-4.** Adsorption-desorption isotherms of CuO-ZnO/TiO<sub>2</sub> prepared sonochemically with commercial TiO<sub>2</sub> P25(Degussa).

**Table SI-1** Surface characteristics for the catalysts S500.

| Catalyst | Conditions of experiment | Surface area (m <sup>2</sup> /g) | Pore volume (cc/g) | Pore size (Å) |
|----------|--------------------------|----------------------------------|--------------------|---------------|
| S500     | As prepared              | 47                               | 0.12               | 60            |
|          | After reaction           | 46                               | 0.11               | 114           |
|          | 90h stability test       | 62                               | 0.09               | 90            |
